# Supplementary material
Source: PubMed Central journal article supplement (PMC2234342)

Supplemental Figure 1

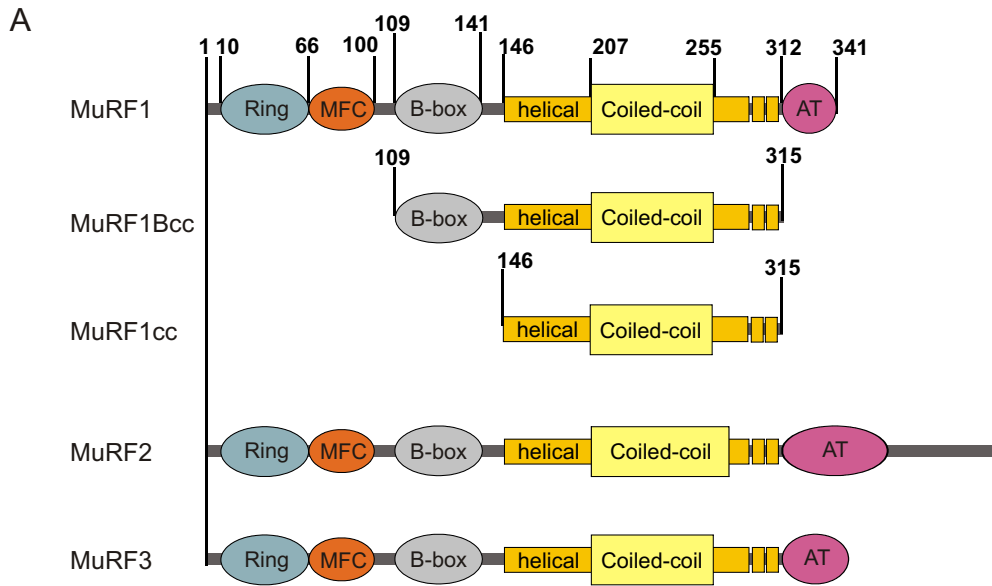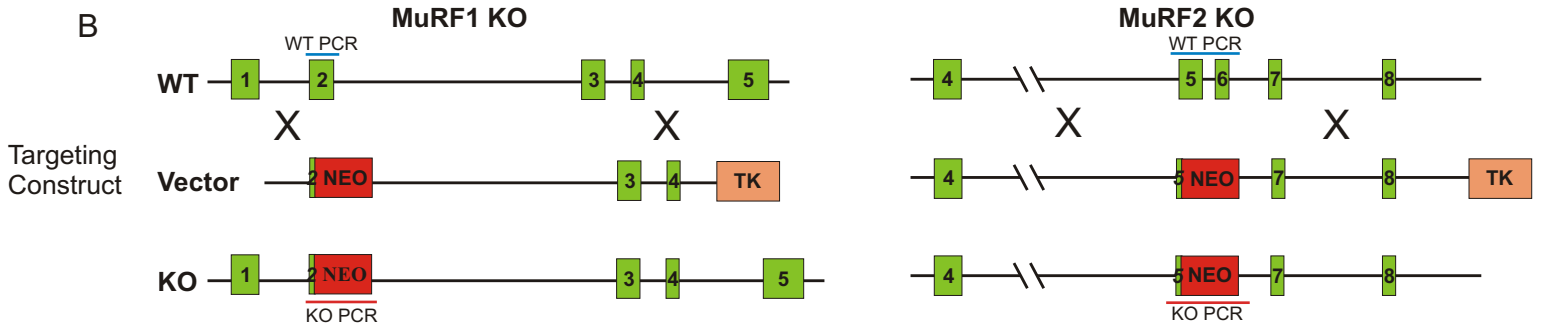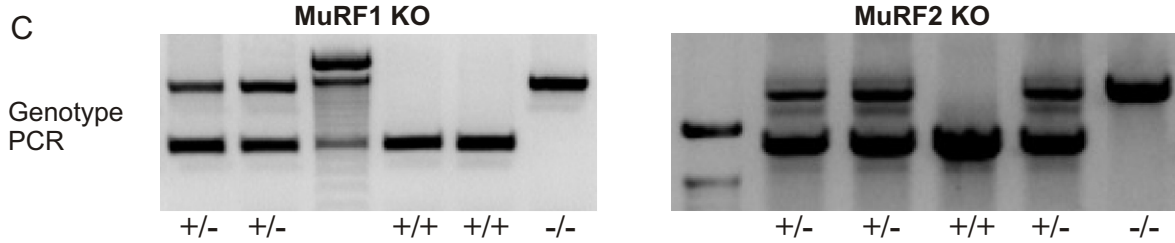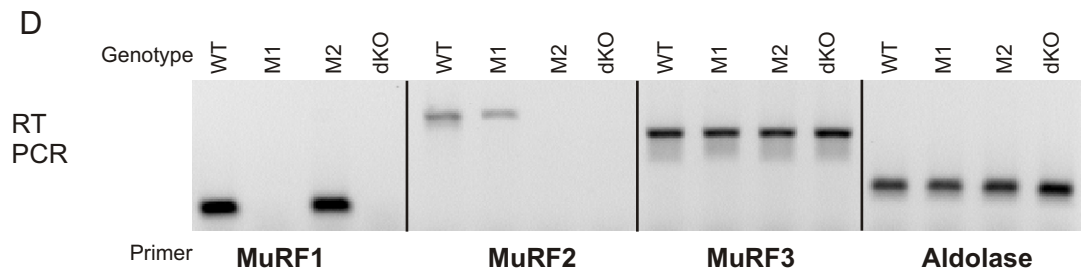

Supplement: 7601952s1.pdf [file 7601952s1.pdf]

# Supplemental Figure 10

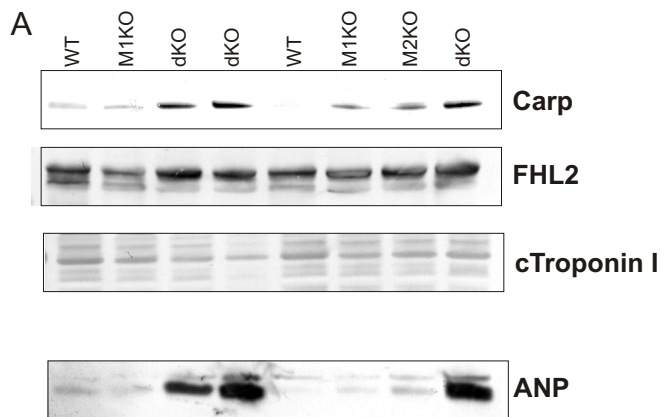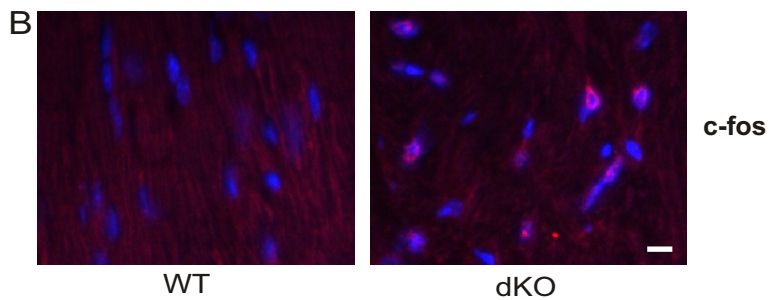

Supplement: 7601952s10.pdf [file 7601952s10.pdf]

Supplemental Figure 2

A

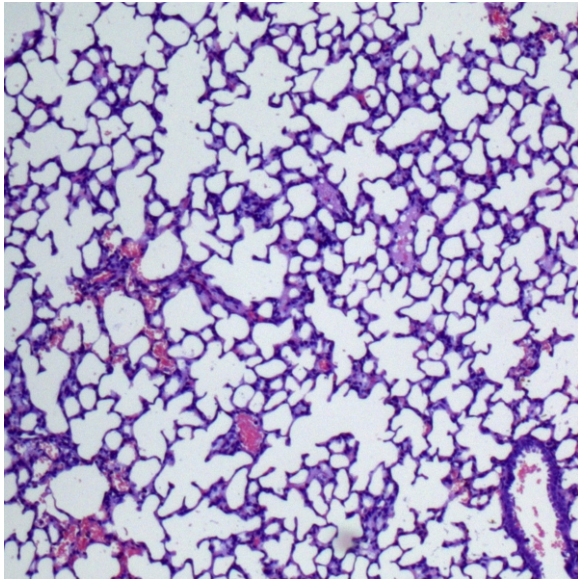

WT

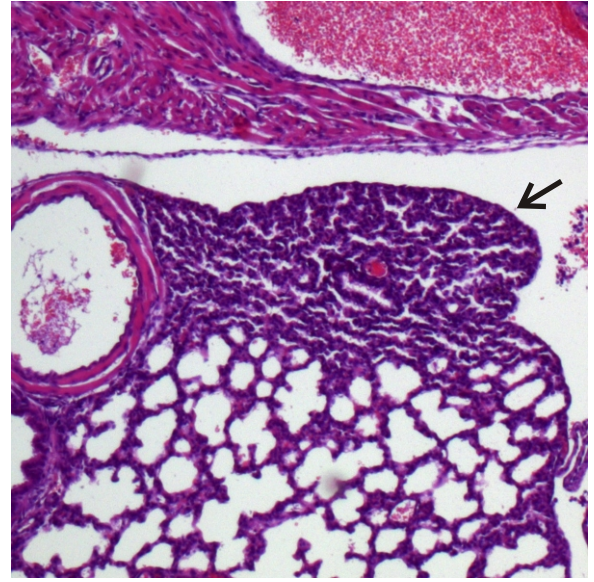

dKO

B

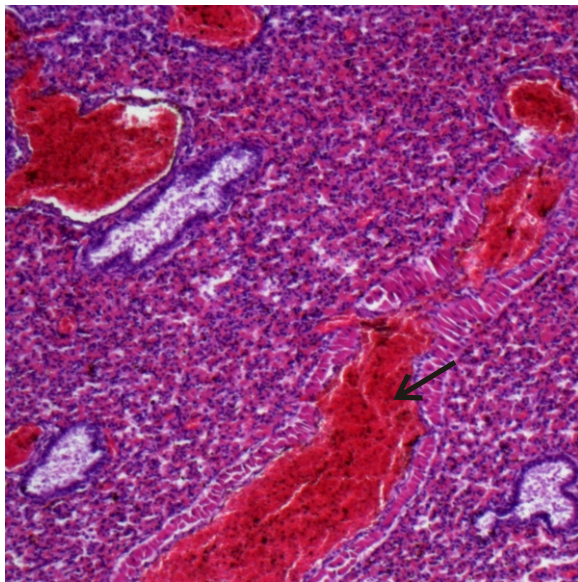

dKO

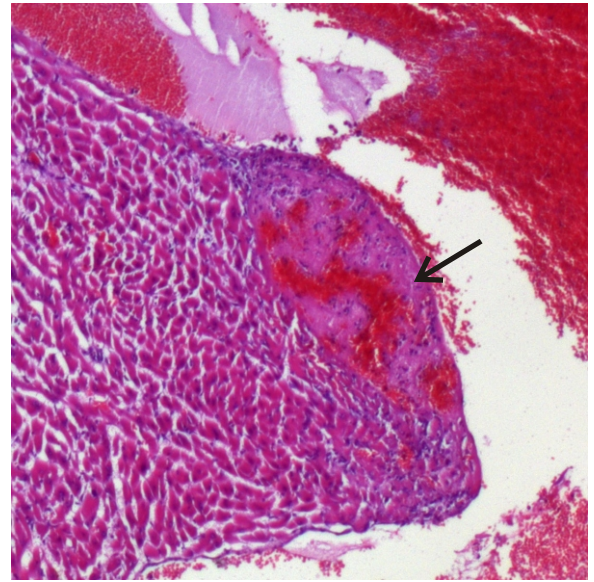

dKO

Supplement: 7601952s2.pdf [file 7601952s2.pdf]

# ECG Scan: Wildtype

A

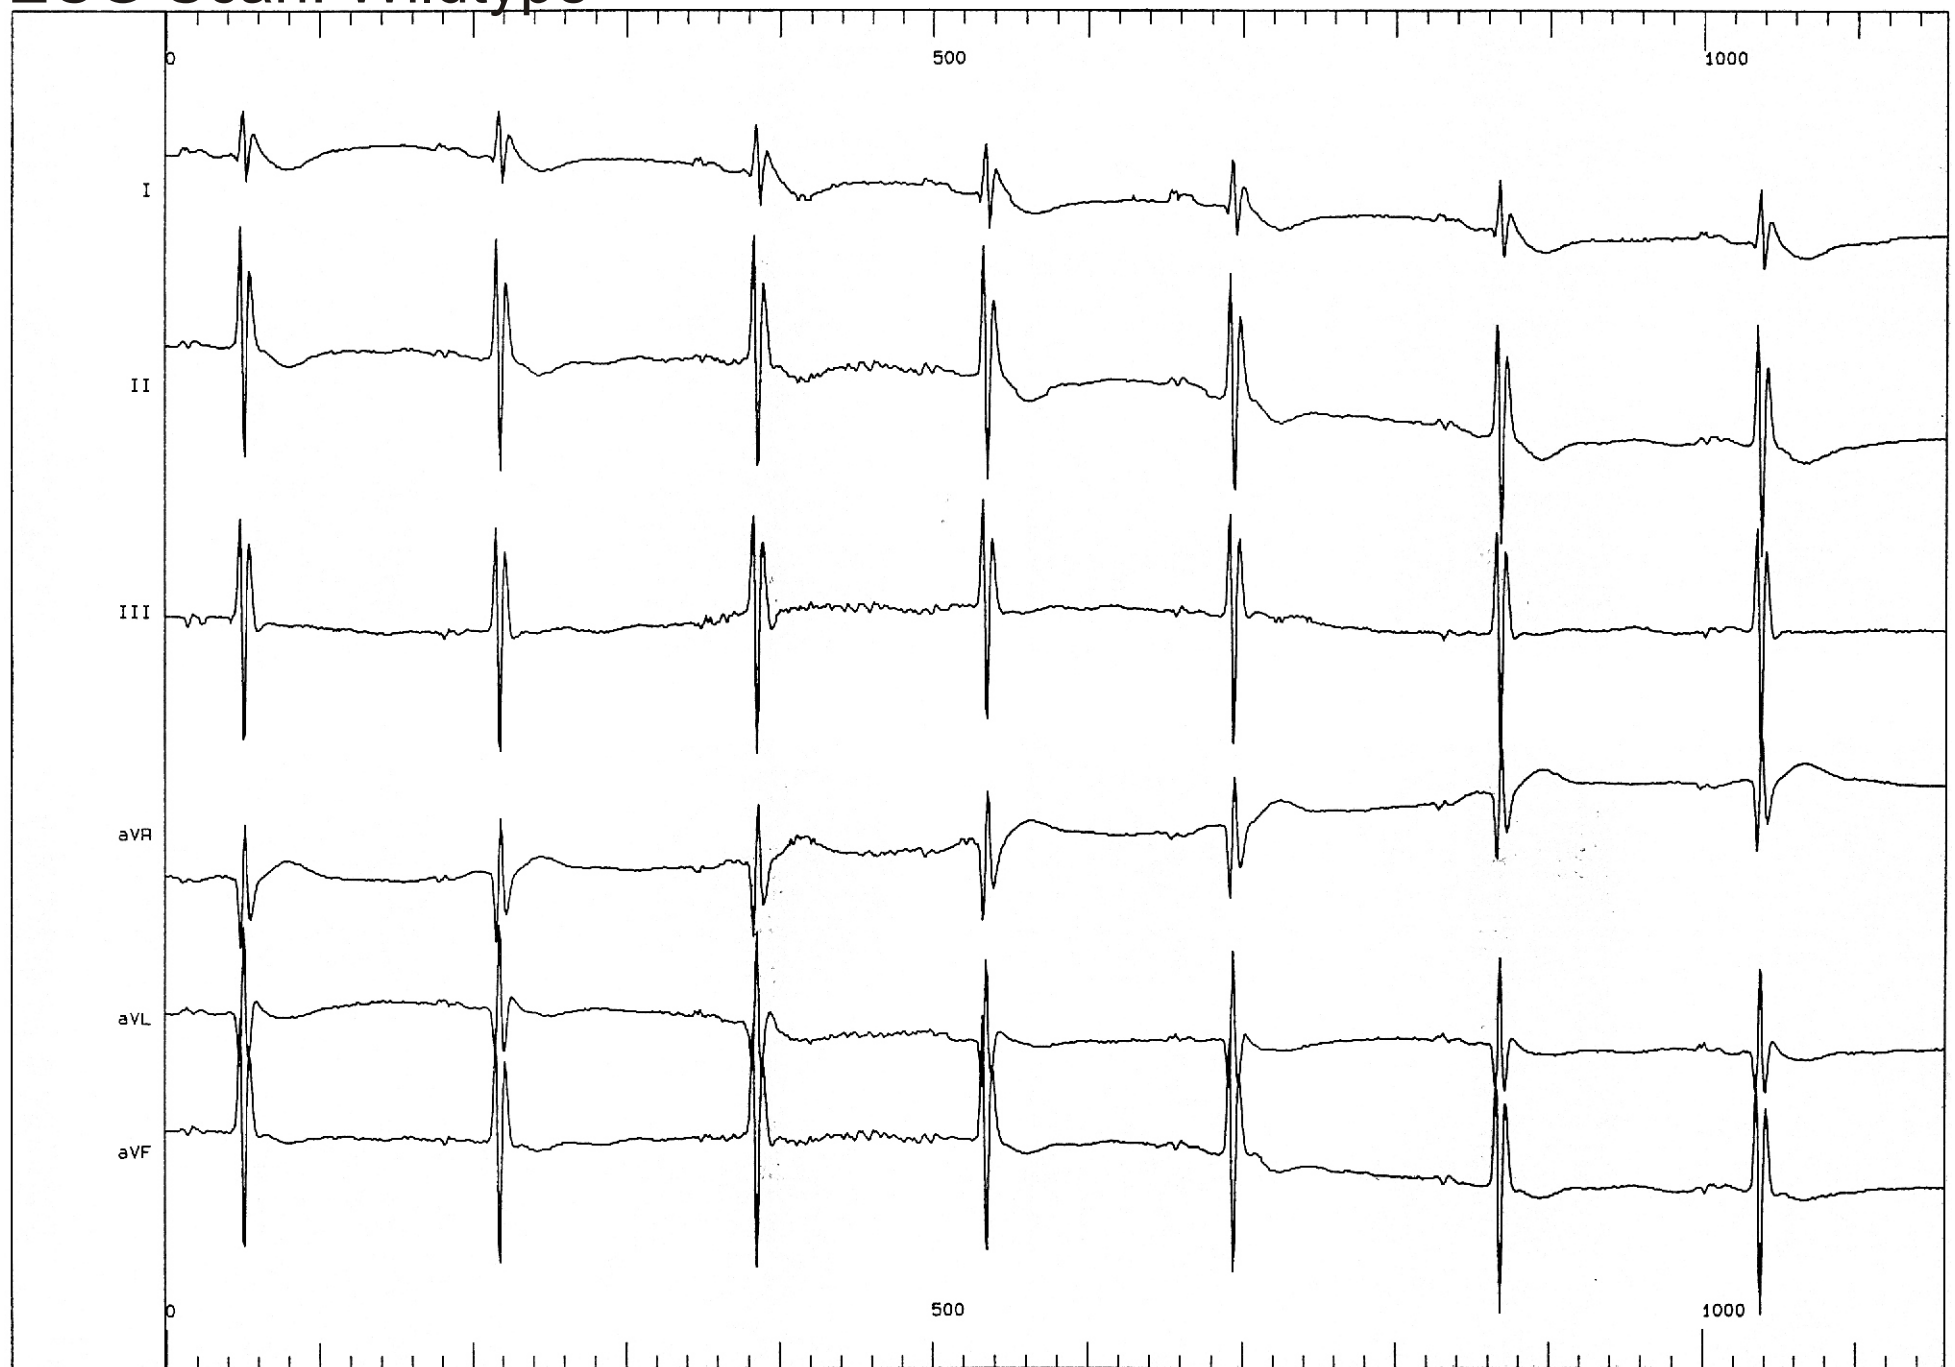

# ECG Scan: MuRF1

B

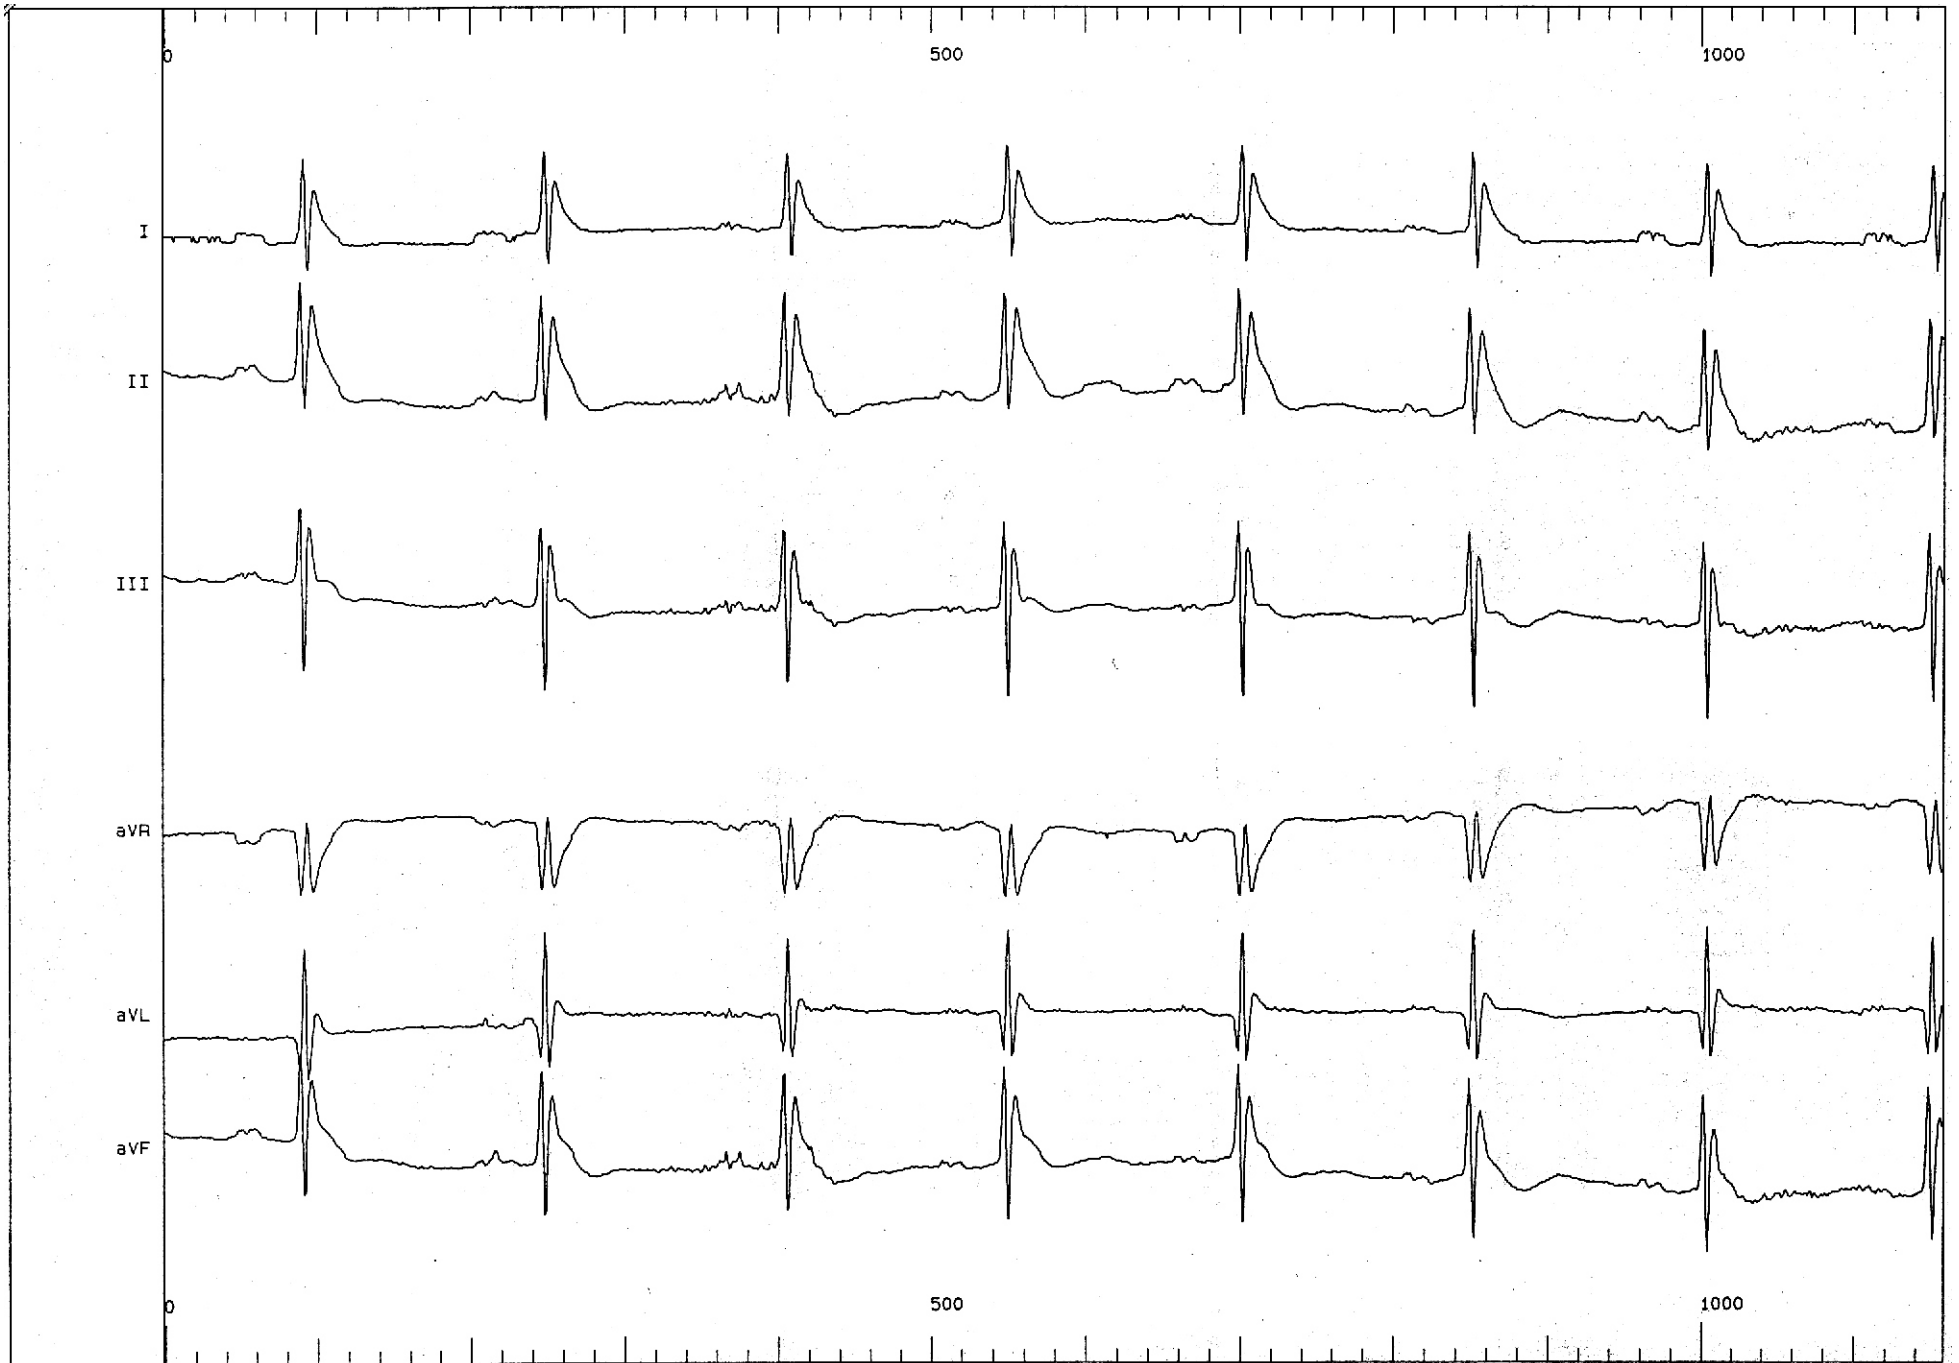

# ECG Scan: MuRF2

C

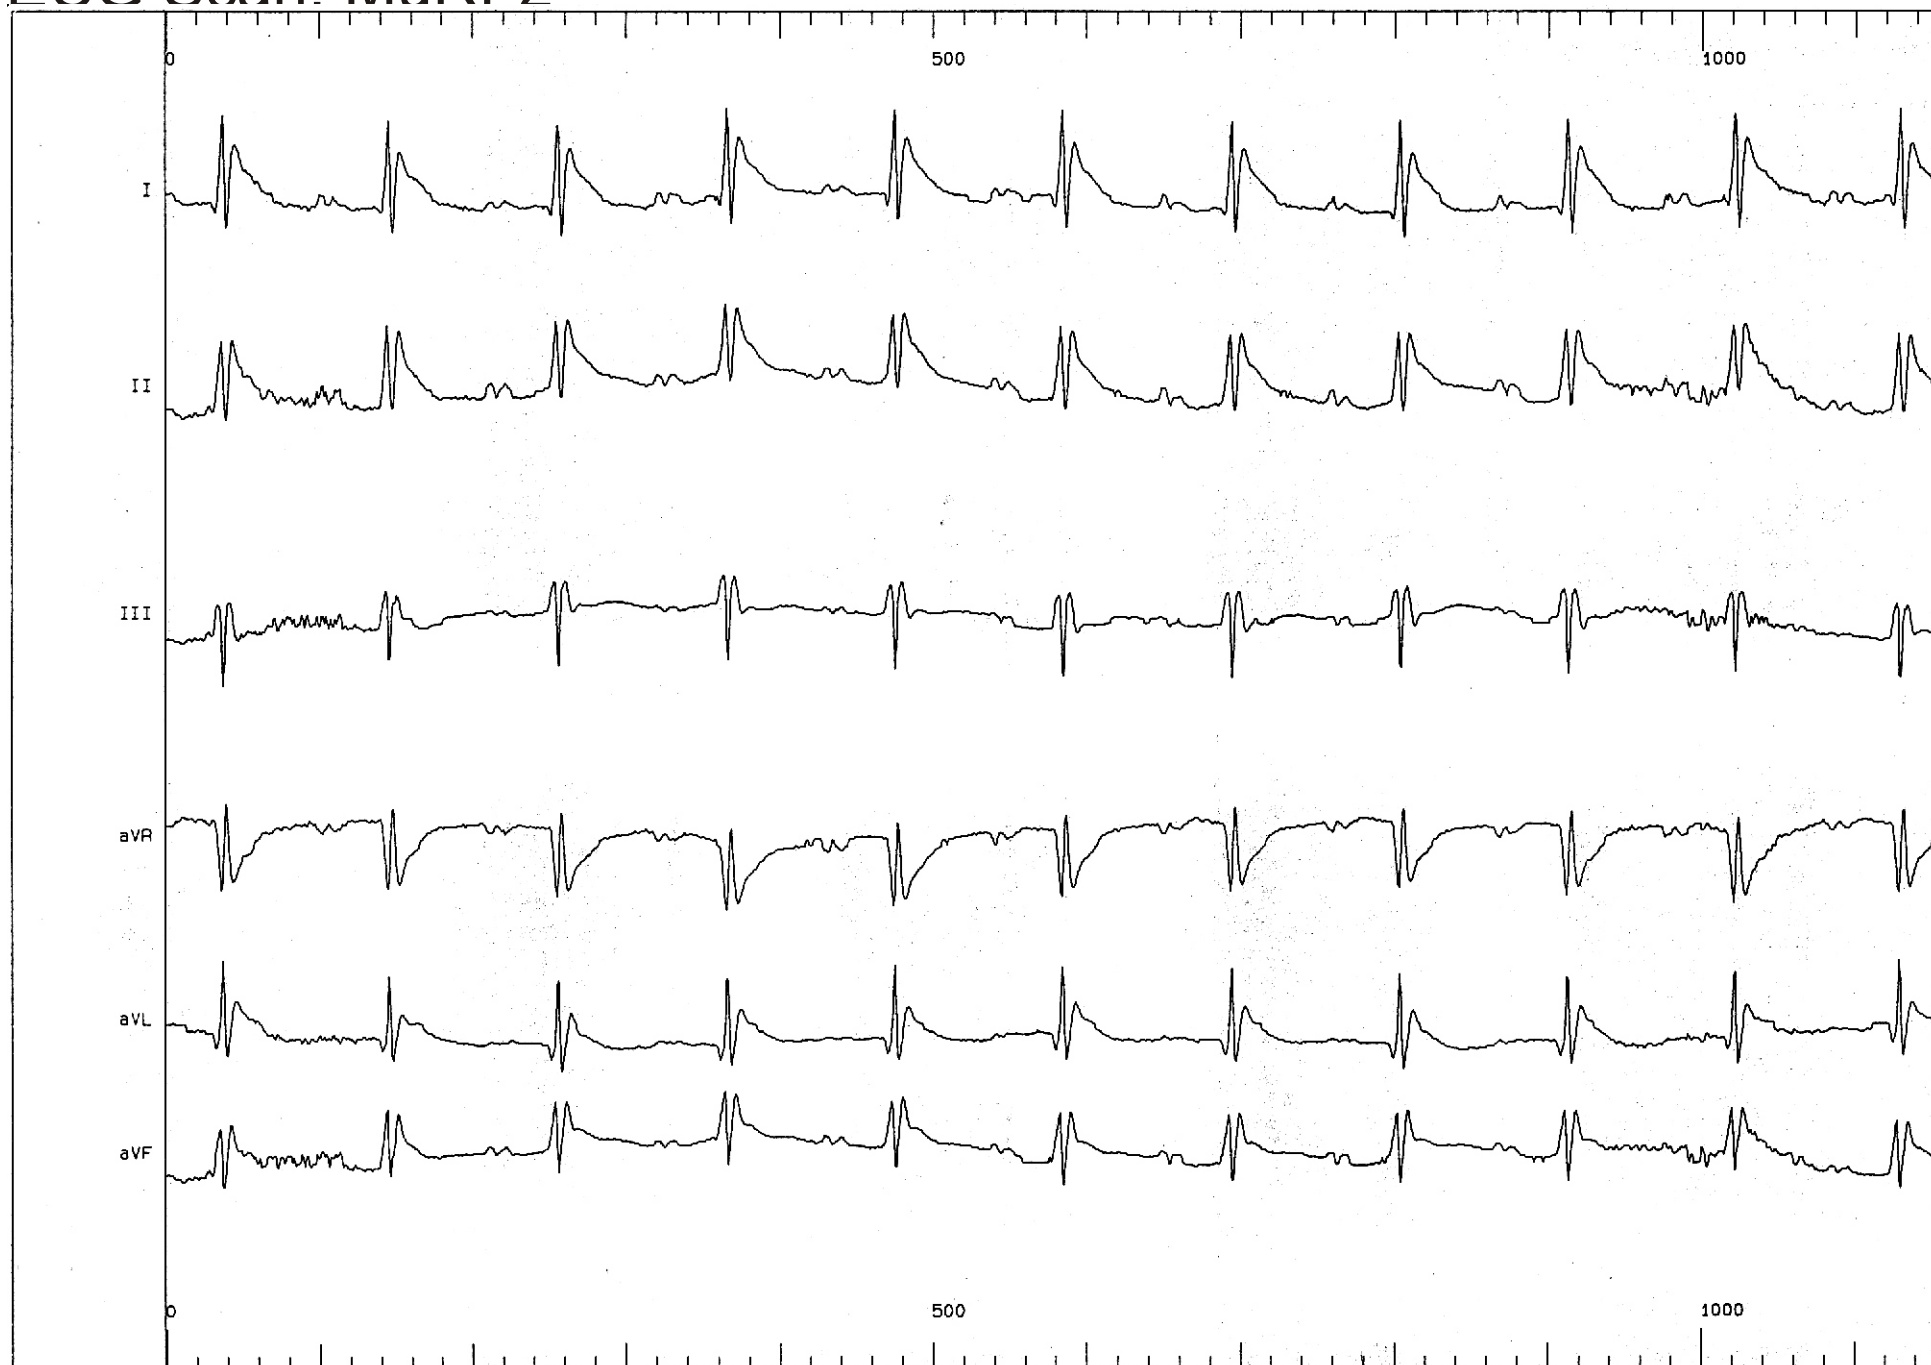

# ECG Scan: dKO

D

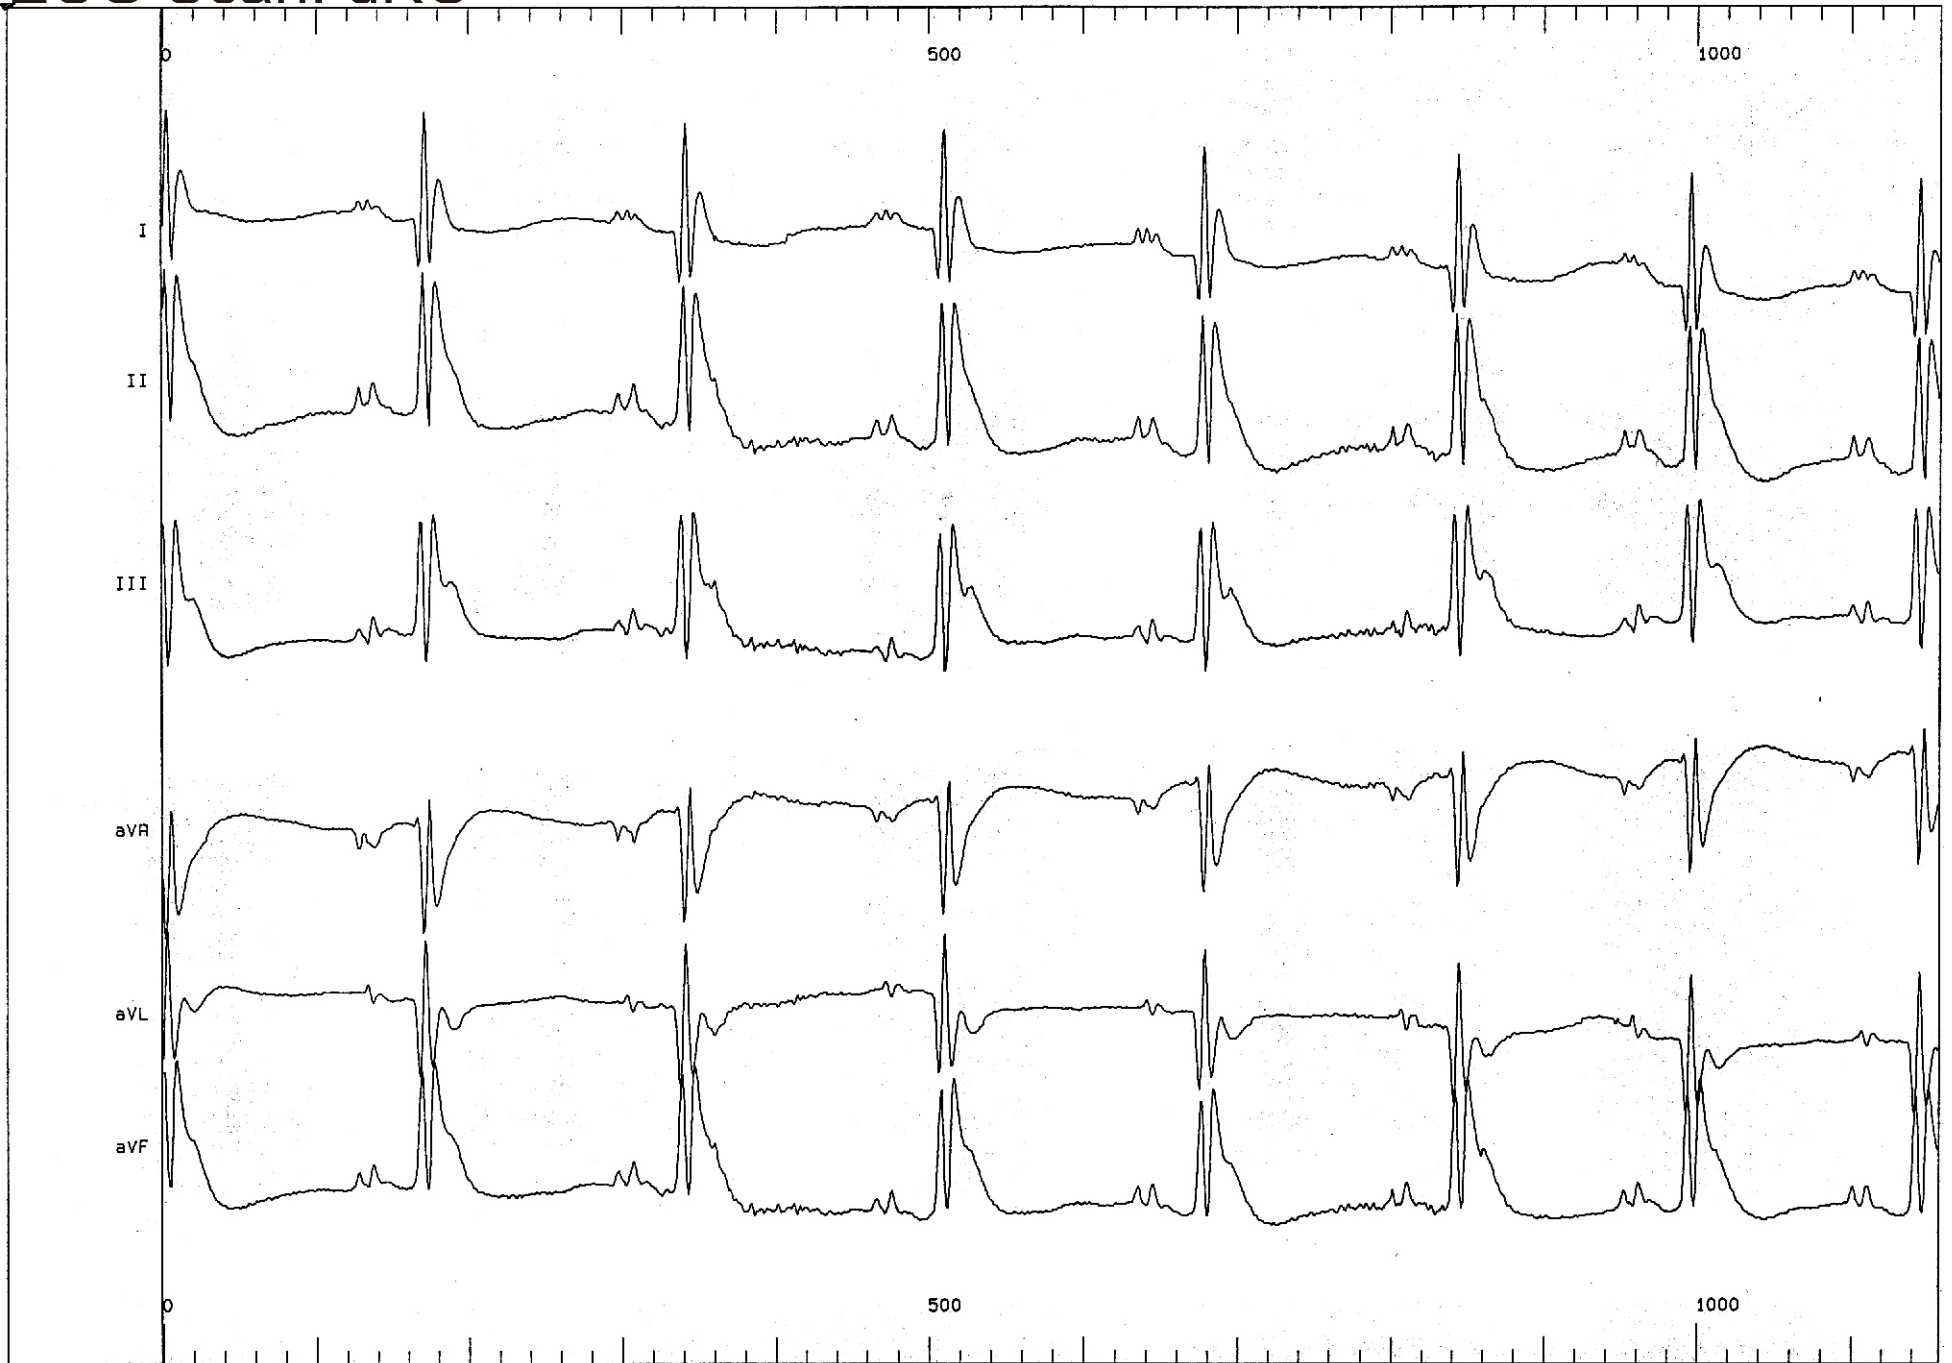

Supplement: 7601952s3.pdf [file 7601952s3.pdf]

## Supplemental Figure 8

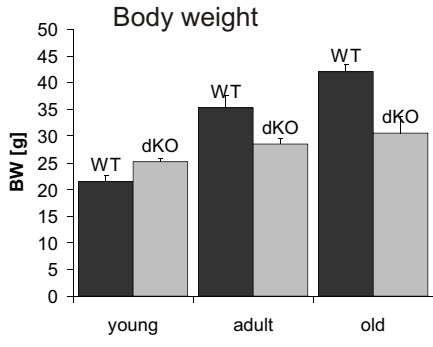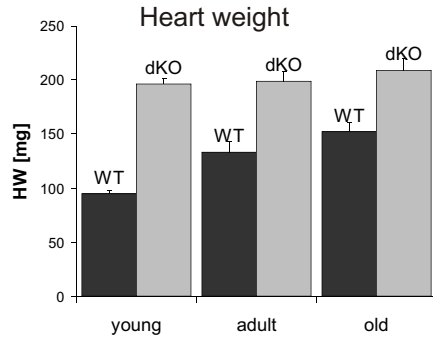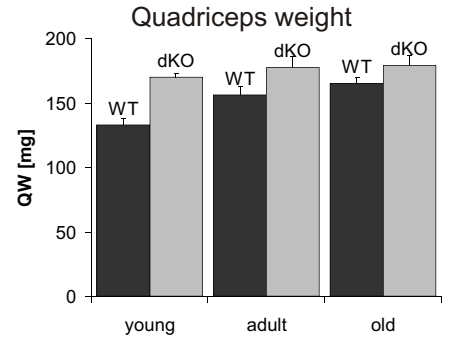

Supplement: 7601952s8.pdf [file 7601952s8.pdf]
